# Supplementary material for: Euthanasia Assessment in Ebola Virus Infected Nonhuman Primates
Source: Viruses. 2014 Nov 24;6(11):4666–82. doi: 10.3390/v6114666 (PMC4246243; doi:10.3390/v6114666)
Supplement: Supplementary File 1 [file viruses-06-04666-s001.xlsx]

## Sheet: Sheet1
PARAMETERS CONSIDERED BUT DID NOT CORRELATE WITH SURVIVAL
GGT MIN
CRE MIN
TP MIN
AMY MIN
PLT MIN
MCV MAX
MCV MIN
HCT MAX
BUN MIN
ALT MIN
RBC MAX
ALT MAX
CA MAX
AST MAX
Year
AST MIN
TP MAX
UA MAX
TEMP MAX
PFU
HCT MIN
HGB MIN
ALB MAX
LY% MIN
LY# MIN
RBC MIN
ALB MIN
TEMP MIN
UA MIN
ALP MAX
GLU MAX
TBIL MIN
ALP MIN
WBC MIN
